# Supplementary material for: Styrene oligomerization as a molecular probe reaction for Brønsted acidity at the nanoscale
Source: Royal Society of Chemistry journal article supplement (doi:10.1039/c2cp22848c), 2012-01-01
Supplement: c2cp22848c.pdf [file c2cp22848c.pdf]

Cite this: DOI: 10.1039/c0xx00000x

www.rsc.org/xxxxxx

ARTICLE TYPE

## Styrene Oligomerization as a Molecular Probe Reaction for Brønsted Acidity at the Nanoscale

Luis R. Aramburo,<sup>a</sup> Sue Wirick,<sup>b</sup> Piter S. Miedema,<sup>a</sup> Inge L. C. Buurmans,<sup>a</sup> Frank M. F. de Groot<sup>a</sup> and Bert M. Weckhuysen<sup>a,\*</sup>

Received (in XXX, XXX) Xth XXXXXXXXXX 20XX, Accepted Xth XXXXXXXXXX 20XX

DOI: 10.1039/b000000x

### Supporting Information

10

#### 1) X-ray diffraction measurements

XRD patterns were obtained at room temperature from 5° to 90°  $2\theta$  with a Bruker-AXS D8 Advance powder X-ray diffractometer, equipped with an automatic divergence slit, a Vântec-1 detector, and a Co K-alpha 1,2 ( $\lambda$  - 1.79026 Å) source.

In view of the obtained results the overall ZSM-5 zeolite structure is maintained after steaming, as revealed by the similitude of the XRD patterns presented in Figure S1.

20

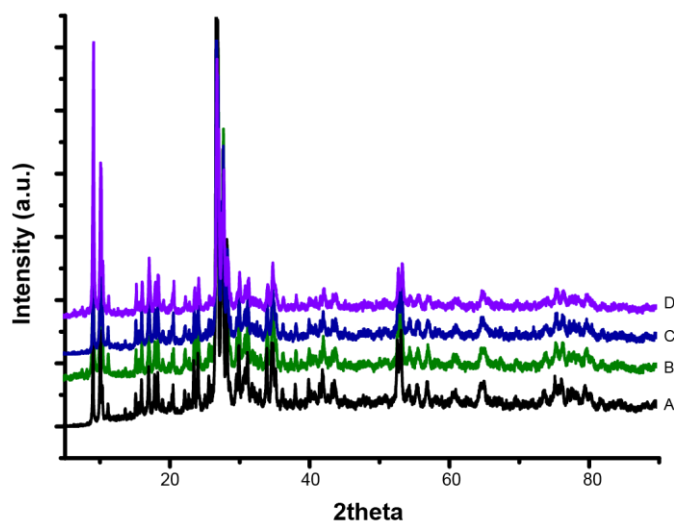

40

Fig. S1 XRD pattern of H-ZSM-5-P (A) and H-ZSM-5-600 (B), H-ZSM-5-700 (C) and H-ZSM-5-800 (D).

45
